# Supplementary material
Source: HighWire-hosted journal article supplement (https://bmjopen.bmj.com/content/14/1/e078102)
Supplement: inline-supplementary-material-2 [file inline-supplementary-material-2.pdf]

SEARCH STRATEGY

1. Korean articles

RISS: <https://www.riss.kr/index.do>

ScienceON(=KISTI): <https://scienceon.kisti.re.kr/srch/selectPORSrchArticleList.do>

KISS: <https://kiss.kstudy.com/>      KoreaMed, <https://www.koreamed.org/>

KMBASE: <https://kmbase.medric.or.kr/>

| Database      |         | No. | Search term                                                                                          |
|---------------|---------|-----|------------------------------------------------------------------------------------------------------|
| RISS          | Korean  | 1   | 윤리풍토/병원윤리풍토/윤리적 환경/윤리적 근무환경/윤리적 업무환경                                                                 |
|               |         | 2   | 간호/간호사                                                                                               |
|               |         | 3   | 윤리/윤리적                                                                                               |
|               |         | 4   | 1 AND 2 AND 3                                                                                        |
|               | English | 1   | working conditions/work environment/ethical climate/ethical environment/<br>ethical work environment |
|               |         | 2   | nurses/nursing staff/registered nurses/nursing staff/nursing                                         |
|               |         | 3   | ethics/ethical                                                                                       |
|               |         | 4   | 1 AND 2 AND 3                                                                                        |
| Science<br>On | Korean  | 1   | 윤리풍토/병원윤리풍토/윤리적 환경/윤리적 근무환경/윤리적 업무환경                                                                 |
|               |         | 2   | 간호/간호사                                                                                               |
|               |         | 3   | 윤리/윤리적                                                                                               |
|               |         | 4   | 1 AND 2 AND 3                                                                                        |
|               | English | 1   | working conditions/work environment/ethical climate/ethical environment/<br>ethical work environment |
|               |         | 2   | nurses/nursing staff/registered nurses/nursing staff/nursing                                         |
|               |         | 3   | ethics/ethical                                                                                       |
|               |         | 4   | 1 AND 2 AND 3                                                                                        |

| Database |         | Search term                                                                                                                                                                                                       |
|----------|---------|-------------------------------------------------------------------------------------------------------------------------------------------------------------------------------------------------------------------|
| KISS     | Korean  | 윤리풍토 AND 간호<br>윤리풍토 AND 간호사<br>윤리적 환경 AND 간호<br>윤리적 환경 AND 간호사<br>윤리적 환경 AND (간호 OR 간호사)<br>윤리적 근무환경 AND (간호 OR 간호사)                                                                                              |
|          | English | (ethical climate) AND nursing<br>(ethical climate) AND nurses<br>(ethical environment) AND nursing<br>(ethical environment) AND nurses<br>(ethical work environment) AND (nursing OR nurses)                      |
| KoreaMed | English | (ethical climate)[ALL]<br>(ethical environment)[ALL]<br>(work environment)[ALL]<br>(ethical work environment)[ALL]<br>("nurse "[ALL])<br>("nursing"[ALL])                                                         |
| KMBASE   | English | ethical climate<br>(work environment) AND (nurses OR nursing)<br>(ethical climate) AND (nurses OR nursing)<br>(ethical environment) AND (nurses OR nursing)<br>(ethical work environment) AND (nurses OR nursing) |

2. English articles: PubMed, Cochrane Library, Embase, and CINAHL

| Database | No. | Search term                                                                                                                                   |
|----------|-----|-----------------------------------------------------------------------------------------------------------------------------------------------|
| PubMed   | 1   | "Ethics"[Mesh] OR Ethic*[TW]                                                                                                                  |
|          | 2   | "Nurses"[Mesh] OR "Nursing Staff"[Mesh] OR "Registered Nurs*[TW] OR Nurs*[TW] OR "Nursing Staff*[TW]                                          |
|          | 3   | "Working Conditions"[Mesh] OR "Work* Environment*[TW] OR "ethical climate"[TW] OR "ethical environment"[TW] OR "ethical work environment"[TW] |

|                  |   |                                                                                                                                           |
|------------------|---|-------------------------------------------------------------------------------------------------------------------------------------------|
|                  | 4 | "Korea"[Mesh] OR "Korea*"[TW]                                                                                                             |
|                  | 5 | #1 AND #2 AND #3 AND #4                                                                                                                   |
| Cochrane Library | 1 | [mh "Ethics"] OR ethic*; ab,ti,kw                                                                                                         |
|                  | 2 | [mh "Nurses"] OR [mh "Nursing Staff"] OR (registered nurs* OR nurs* OR nursing staff*); ab,ti,kw                                          |
|                  | 3 | [mh "Working Conditions"] OR (work* environment* OR ethical climate OR ethical environment OR ethical work environment); ab,ti,kw         |
|                  | 4 | [mh "Korea"] OR Korea*; ab,ti,kw                                                                                                          |
|                  | 5 | #1 and #2 and #3                                                                                                                          |
|                  | 6 | #5 and #6                                                                                                                                 |
| Ovid-EMBASE      | 1 | 'ethics'/exp OR ethic*; ab,ti,kw                                                                                                          |
|                  | 2 | 'nurses'/exp OR 'nursing staff'/exp OR (('registered nurs*' OR nurs* OR 'nursing staff*'); ab,ti,kw)                                      |
|                  | 3 | 'working conditions'/exp OR (('work* environment' OR 'ethical climate' OR 'ethical environment' OR 'ethical work environment'); ab,ti,kw) |
|                  | 4 | #1 AND #2 AND #3                                                                                                                          |
|                  | 5 | 'Korea'/exp OR 'Korea*'; ab,ti,kw                                                                                                         |
|                  | 6 | #4 AND #5                                                                                                                                 |
| CINAHL           | 1 | (MH "Ethics+") OR Ethic*                                                                                                                  |
|                  | 2 | (MH "Nurses") OR (MH "Staff Nurses") OR "Registered Nurs*" OR "Nursing Staff*" OR Nurs*                                                   |
|                  | 3 | (MH "Work Environment*") OR AB(Work* Environment* OR "ethical climate" OR "ethical environment" OR "ethical work environment")            |
|                  | 4 | S1 AND S2 AND S3                                                                                                                          |
|                  | 5 | S1 AND S2 AND S3   Language: - korean<br>Language: - english                                                                              |
